# Supplementary material for: Antibiotic treatment–induced secondary IgA deficiency enhances susceptibility to Pseudomonas aeruginosa pneumonia
Source: JCI journal article supplement (doi:10.1172/jci97065), 2018-05-17
Supplement: sd1 [file 1]

## Supplemental data:

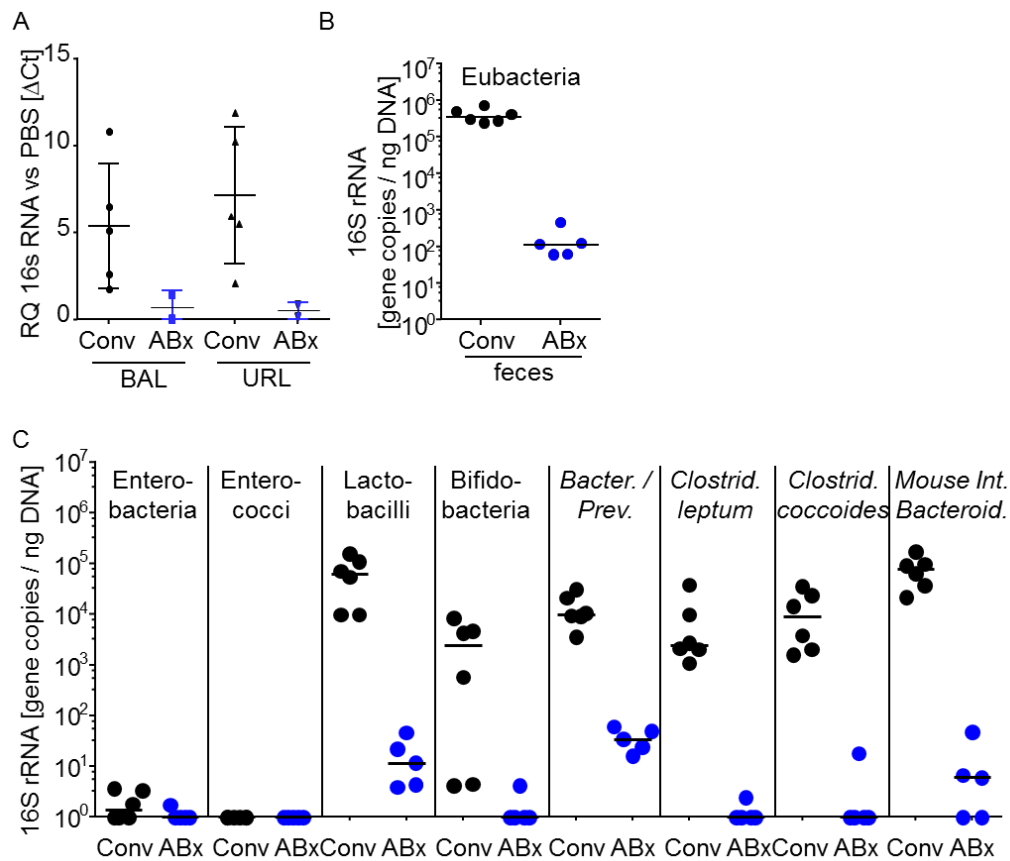

**Supplemental Figure 1:** Antibiotic treatment depletes the respiratory and intestinal microbiota.

(A) Total eubacterial bacterial loads of the lung microbiota (BALF) and upper respiratory tract microbiota (URL) of untreated (conv) and antibiotic-treated mice (ABx) were quantified by qPCR (relative quantification of 16S rRNA gene over PBS controls) (n = 5 for conv. mice; n = 2 for ABx mice). (B) The total eubacterial loads and (C) the main intestinal bacterial groups including enterobacteria, enterococci, lactobacilli, bifidobacteria, *Bacteroides/Prevotella* species, *Clostridium leptum* group, *Clostridium coccoides* group and *Mouse Intestinal Bacteroides* were assessed in fecal samples derived from conventionally colonized (Conv) and antibiotic-treated (ABx) mice applying qPCR amplifying variable regions of the bacterial 16S rRNA genes (expressed as 16S rRNA gene numbers per ng DNA) (n = 6 for conv. mice; n = 5 for ABx mice).

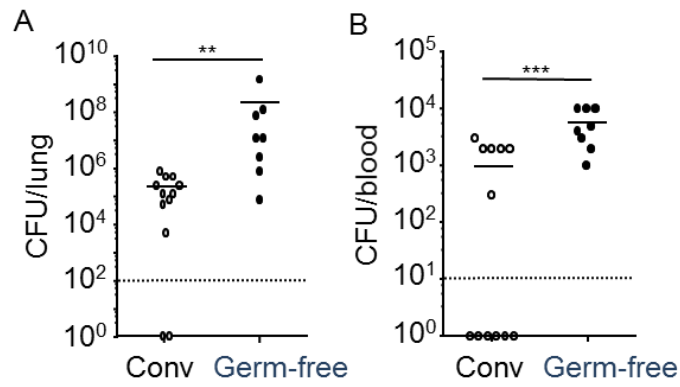

**Supplemental Figure 2:** Antibacterial immunity against *P. aeruginosa* is strongly impaired in germ-free as compared to conventionally colonized mice. Conventionally colonized and germ-free mice were intranasally infected with *P. aeruginosa*  $10^5$  CFU/mouse, and (A) bacterial loads in the lung and (B) blood were quantified after 24 h (n = 12 for conv. mice; n = 8 for germ-free mice).

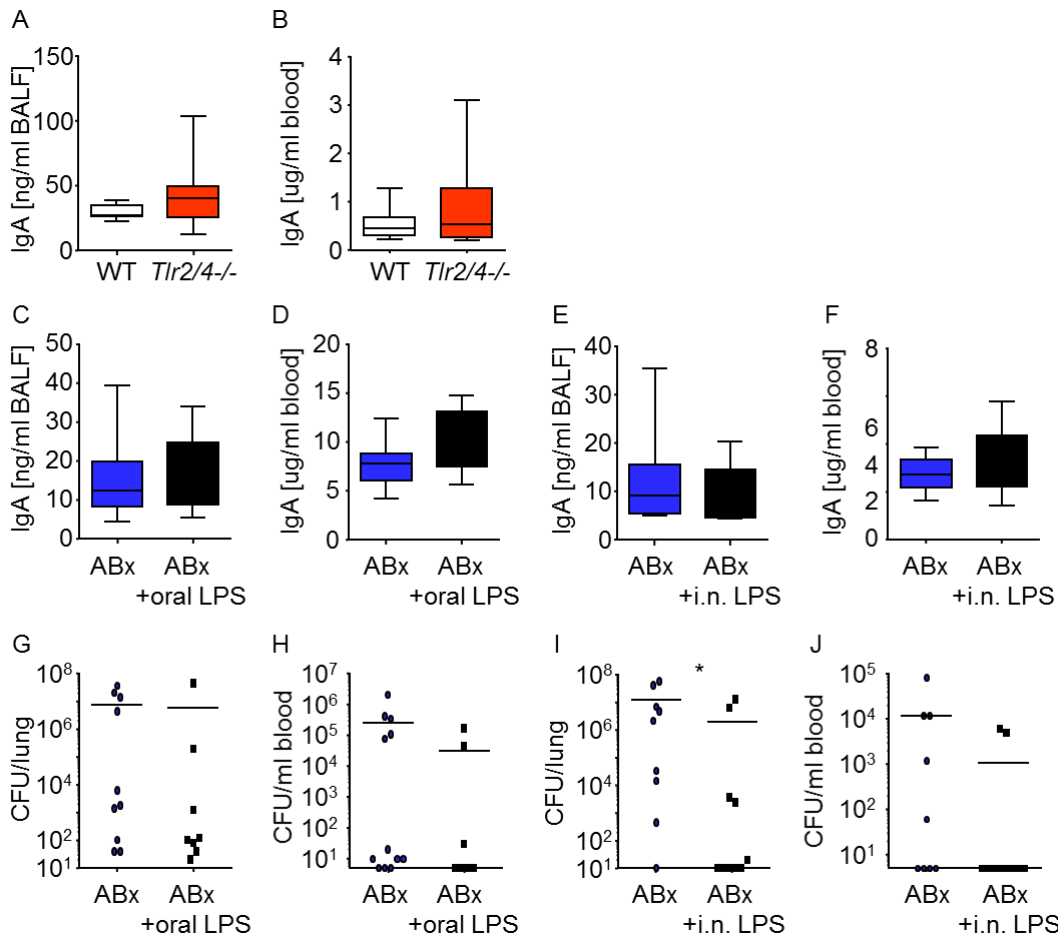

**Supplemental Figure 3:** TLR2 and-4 are not involved in IgA production and LPS application does not restore IgA production in antibiotic-treated mice. (A, B) IgA levels were measured in BALF and blood of WT and *Tlr2/4-/-* mice. (C-E) IgA levels were determined in BALF and blood of microbiota-depleted animals (ABx), microbiota-depleted animals that received LPS orally (ABx + oral LPS) or intranasally (ABx + i.n. LPS). (C, D, n = 12 for ABx, n = 11 for ABx + oral LPS; E, F, n = 9 for ABx, n = 10 for ABx + i.n. LPS). (G-J) Microbiota-depleted animals (ABx), microbiota-depleted animals that received LPS orally (ABx + oral LPS), and microbiota-depleted mice that received LPS intranasally (ABx + i.n. LPS) were infected with *P. aeruginosa*. Bacterial loads in lung and blood were assessed (G, n = 10 for ABx, n = 10 for ABx + oral LPS; H, n = 12 for ABx, n = 9 for ABx + oral LPS; I, n = 9 for ABx, n = 10 for ABx + i.n. LPS; J, n = 9 for ABx, n = 10 for ABx + i.n. LPS). Mann-Whitney tests were applied to the data set. Values are given as mean  $\pm$  standard deviation. \*p < 0.05.
